# Supplementary material for: “This whole thing is relationship medicine”: A qualitative analysis of mobile and street-delivered medication for opioid use disorder in King County, Washington, using RE-AIM
Source: Research Square preprint supplement (doi:10.21203/rs.3.rs-9132767/v1), 2026-04-01
Supplement: Supplementary file 1 [file 93239c6f708663d7f2d75856.docx]

**Semi-structured interview guide informed by RE-AIM**

| **Introduction** |
| --- |
| 1. **Please introduce yourself and tell me about you and your background as it pertains to the work you do.**     1. Probe: What brought you to this work? 2. **Can you please describe your current role & what you do?**     1. Probe: What is the official title for your role? How long have you held the position?    2. Probe: What does a typical day of work look like? 3. **As we talk about your program, can you please tell me which of the following services you provide?**     1. Harm Reduction services?       1. Examples: Opioid overdose reversal kits (Naloxone) & overdose education, mitigating high-risk co-occurrence of HIV, viral hepatitis, bacterial & fungal infections (Mavyret therapy, wound care, Hep C testing, etc.), distribution of sterile supplies (i.e. needles, pipes), housing assessments & referrals    2. OUD services?       1. Examples: MOUD (medication for opioid use disorder) like methadone or buprenorphine, counseling for OUD & referrals for treatment    3. Mental Health/Behavioral Health services?       1. Counseling, medication management, addiction & chemical dependency, therapy |
| **Section 1** |
| Objective: To understand how programs in King County delivering OUD, mental health, and harm reduction services identify and reach persons in need, implement their services, and adopt them to the community setting.  *(Reach, Implementation, Adoption)* |
| 1. **Please describe the specific interventions and services you deliver to clients with** [OUD, mental health, harm reduction] **needs in the community.**     1. Probe: What do your day-to-day activities look like? 2. **Tell me about the populations your organization serves.**    1. Probe: What population do you prioritize for the community-delivered [OUD, mental health, harm reduction] services you provide?    2. Probe: What socio-demographics do you aim to serve? 3. **How do you identify clients needing or wanting your services?**    1. Probe: What recruitment strategies do you use to reach clients? (e.g. peer network, advertising, in-person outreach, community partnerships, etc.)    2. Probe: Where do you go to find your clients?       1. Probe: Are there specific physical locations you prioritize to find your clients? (e.g. at home, certain streets, encampments)    3. Probe: What specific geographic regions/areas do you serve?    4. Probe: Are you seeking out clients, or are they seeking you out? 4. **What strategies do you use to engage with clients regularly?**     1. Probe: How do you primarily communicate with clients? *In-person, over the phone….*    2. Probe: How do clients like to be communicated with? What are their preferences?    3. Probe: How frequently are you engaging with clients? *Daily, weekly, ad-hoc/as-needed basis…*    4. Probe: What does a typical day or week of engagement look like with a client?    5. Probe: How do you keep clients engaged in care/services in the long term?    6. Probe: If a client exits services like stops engaging or is lost to follow-up, how do you re-engage with them? How much outreach do you do? 5. **Which clients do you think your services are not reaching for participation and engagement?**     1. Probe: What ideas have you had about how to reach clients you currently aren’t reaching?    2. Probe: How do you handle clients who engage with your services sporadically? Like clients who have changing circumstances or seek help only when they feel it's necessary 6. **Please tell us more about how acceptable your clients find your services.**     1. Probe: Please expand on how you think the clients feel about getting their care in the community (vs. care in a typical clinical setting).    2. Probe: How have clients adopted these services (i.e., made a deliberate choice to use or engage with them)? 7. **What does the entire team of providers & support staff look like for your services?**    1. Probe: What types of professions are represented?    2. Probe: Please share more on why the team is organized in this way.    3. Probe: What are the different skills or perspectives that everyone brings to the team, services, or clients? 8. **When staff go out into the community to do outreach &/or provide services, what does that look like?**    1. Probe: Do staff go in teams? If yes, why? & who goes?    2. Probe: What types of supplies do they bring with them?    3. Probe: What does their documentation and communication process look like? 9. **What facilitates service delivery in community settings?**    1. Probe: How do you ensure your services are delivered as designed? (fidelity)       1. Probe: What practices help staff consistently implement services as designed?    2. Probe: How are staff supported by each other or the organization to provide services as designed?    3. Probe: What factors enable or hinder the staff’s ability to deliver services as designed?    4. Probe: What does flexibility in staff roles, protocols, or services look like in the field?    5. Probe: Do you follow any protocols or standards of service when you deliver services in the field?       1. Probe: Tell me more about how you follow, adapt, or borrow from any established community, state, or national guidelines.       2. Probe: How are staff trained to implement said protocols or practices? Are there gaps in that training? 10. **What challenges do you face when delivering** [OUD, mental health, harm reduction] **services in community settings in King County?**      1. Probe: From your perspective, how could they be addressed?     2. Probe: How do these challenges influence the overall implementation or program impact? |
| **Section 2** |
| Objective: To understand how programs in King County evaluate the OUD, mental health, and harm reduction services they deliver in community settings and how they sustain them long-term.  *(Effectiveness, Maintenance)* |
| 1. **How do you define and evaluate the success of your** [OUD, mental health, harm reduction] **services within the community?**    1. Probe: What types of measures/metrics/outcomes are used? Are they quantitative or qualitative in nature?       1. Probe: Are there programmatic outcomes vs client/individual outcomes?       2. Examples: *improvement in mental health screening scores (PHQ-9 or GAD-7), frequency of reported opioid use, # of clients enrolled in care, # of clean needles distributed, etc…?*       3. Probe: How do you track them?       4. Probe: How often are you capturing them vs reporting on them, and who are you reporting them to?    2. Probe: When you think about your clients, how do you know if/when they are doing better or worse? 2. **What strategies have you found to be the most effective for delivering** [OUD, mental health, harm reduction] **services at the individual/client level in the community?**     1. Probe: How does this look different in the short term vs long term?    2. Probe: How sustainable is it?    3. Probe: What threats do you perceive to sustainability? 3. **What strategies have you found to be the most effective for managing** [OUD, mental health, harm reduction] **services at the organizational level?**     1. Probe: How does this look different in the short term vs long term?    2. Probe: How sustainable is this at the organizational level?    3. Probe: What threats do you perceive to sustainability? 4. **What challenges do you face in maintaining these community-delivered services?**    1. Probe: What challenges exist in the context of community? Government? Socially?    2. Probe: What might threaten the long-term success and maintenance of your community-delivered services?    3. Probe: How confident are you in your/the program's ability to continue to provide these services? Why? 5. **How is your program funded?**    1. Probe: How much does your program cost?    2. Probe: How does the cost of funding compare to your other services or interventions?    3. Probe: What threats do you perceive to funding? 6. **How effectively are your services reaching the population you aim to serve?**    1. Probe: Do you think it is reaching those most in need?    2. Probe: Are there specific populations that are more challenging to reach? 7. **What key element makes the** [OUD, mental health, harm reduction] **services you deliver in the community effective or impactful?**     1. Probe: Is there a ‘secret sauce’ or special element you feel strongly influences how the program is carried out & made successful?       1. Probe: What are some examples of the positive impacts your/your program’s services have had (e.g. success stories) that might exemplify the ‘secret sauce’?       2. Probe: What personal factors might be at play or influential?       3. Probe: What structural factors, like organizational or governmental, have contributed? (ex: funding, leadership, county ordinances, state or national law)    2. Probe: What lessons learned or recommendations would you give to other programs looking to improve the sustainability of similar community-delivered services?      1. **What role do community partnerships play in providing these services?**    1. Probe: How does your coordination & collaboration with other NGOs, community partners, local government, etc., impact your ability to maintain these services?    2. Probe: Do these partnerships make your services more impactful? Less impactful? 2. **What has surprised you about doing this work, implementing these programs, and/or providing these services?**    1. Probe: Can you think of any unintended consequences or downsides, if any, of the services and care you provide? If yes, please describe them |
| **Conclusion** |
| 1. **We’ve talked a lot about delivering** [OUD, mental health, harm reduction] **services in community settings. Can you please tell me your thoughts specifically on why you think reaching clients in the community is important?**     1. Probe: Think about the services and how you deliver them and where you deliver them, in the community – why is that important? 2. **What other thoughts or experiences do you have that we haven’t yet addressed?**     1. Probe: Is there anything you wish we asked about? 3. **Do you know of any other programs doing this work that may be interested in participating in the study?** |
